# Supplementary material
Source: PubMed Central journal article supplement (PMC3089657)
Supplement: NIHMS279001-supplement-2.pdf [file NIHMS279001-supplement-2.pdf]

## Supplementary methods

**Thyroid hormones, hypothalamic gene expression, and blood glucose:** We measured plasma TSH and T3 using the Milliplex Rat Thyroid Hormone Panel from Millipore (Cat #RTHY-30K) according to the manufacturer's instructions.

We measured neuropeptide expression in whole hypothalamus. We extracted RNA using a QIAGEN miniprep RNA extraction kit. We synthesized cDNA and performed quantitative RT-PCR using iScript cDNA Synthesis kit (Bio-Rad) and iQ Supermix (Bio-Rad) respectively, according to the manufacturer's protocols. Alternatively, for some genes, we performed qPCR using pre-designed and validated taqman PCR primer/probes sets (Applied Biosystems) on an ABI 7900HT Real-Time PCR System (Applied Biosystems, Inc.). We calculated mRNA expression relative to housekeeping genes, L32 (LPL, Bio-Rad) or 18S (others, ABI) using the  $\Delta\Delta\text{CT}$  method, as in <sup>30</sup>.

We measured blood glucose from trunk blood in duplicate using Accu-chek glucometers and test strips (Roche).

***In vitro* lentivirus studies:** The Institutional Biosafety Committee at the University of Cincinnati approved all lentivirus protocols.

Lentivirus generation: Mitch Lazar (University of Pennsylvania) kindly provided plasmid DNA pCMX that contains the VP16 activation domain and mouse PPAR $\gamma$  (NM\_011146 .3)<sup>14</sup>. We cloned the VP16-PPAR $\gamma$  fragment into the lentivirus vector. America Pharma Source packaged, produced and concentrated the VP16-PPAR $\gamma$  lentivirus and its scrambled control ( $10^8$  viral units  $\mu\text{l}^{-1}$ ). America Pharma Source designed and produced a lentivirus expressing an shRNA against rat PPAR $\gamma$  (NM\_013124),  $10^6$  viral units  $\mu\text{l}^{-1}$ , and its scrambled control.

Cell culture and lentivirus verification: We maintained IVB cells (rat hypothalamic cell line) in DMEM high-glucose medium containing 10% fetal bovine serum and antibiotics (100 U ml<sup>-1</sup> penicillin and 100 µg ml<sup>-1</sup> streptomycin) in a humidified incubator at 37C, 95%O<sub>2</sub>, 5%CO<sub>2</sub>. We conducted viral infection according the manufacture's protocol. Briefly, we seeded the cells in a 24-well plate so they would be 40-50% confluent on the following day. On the day of infection, we replaced the culture media with 200 µl of virus stock (1E+7pfu) and incubated the cells at 37C, 95%O<sub>2</sub>, and 5%CO<sub>2</sub> overnight. We then replaced the viral media with fresh culture media for an additional 48 h before harvested for RNA isolation. We isolated RNA and synthesized cDNA as above. We verified expression of the VP16 domain by PCR. We ran the PCR product on an 8% polyacrylamide TBE gel and visualized using Bio-Rad Quantity One imaging system. We calculated PPAR<sub>γ</sub> mRNA expression relative to β-Actin by quantitative RT-PCR using the Bio-Rad system, as above.
