# Supplementary material
Source: PubMed Central journal article supplement (PMC3089657)
Supplement: NIHMS279001-supplement-3.pdf [file NIHMS279001-supplement-3.pdf]

## Supplementary Figure 1

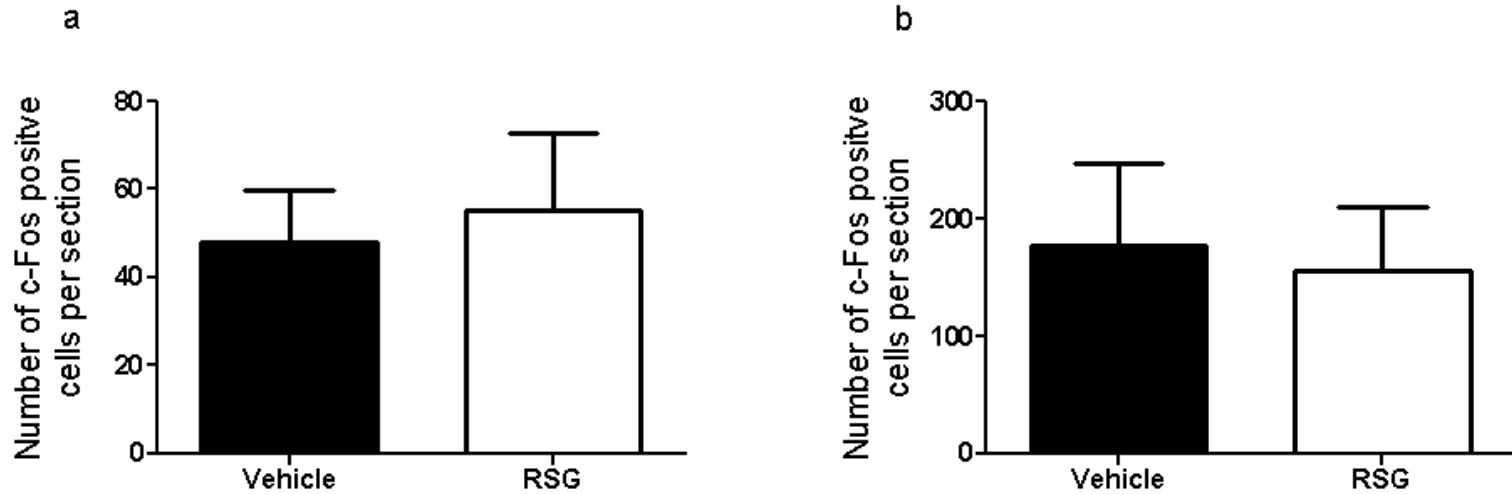

### Supplementary Figure 1. c-Fos in the ARH and DMH following acute i3vt RSG.

c-Fos immunoreactivity in the arcuate (ARH, **a**) or dorsomedial (DMH, **b**) hypothalamus (T-test) at 1 h following 1  $\mu$ g i3vt RSG. The mean for each group is depicted  $\pm$  S.E.,  $n = 3-6$  animals per group.
