# Supplementary material
Source: PubMed Central journal article supplement (PMC3089657)
Supplement: NIHMS279001-supplement-4.pdf [file NIHMS279001-supplement-4.pdf]

## Supplementary Figure 2

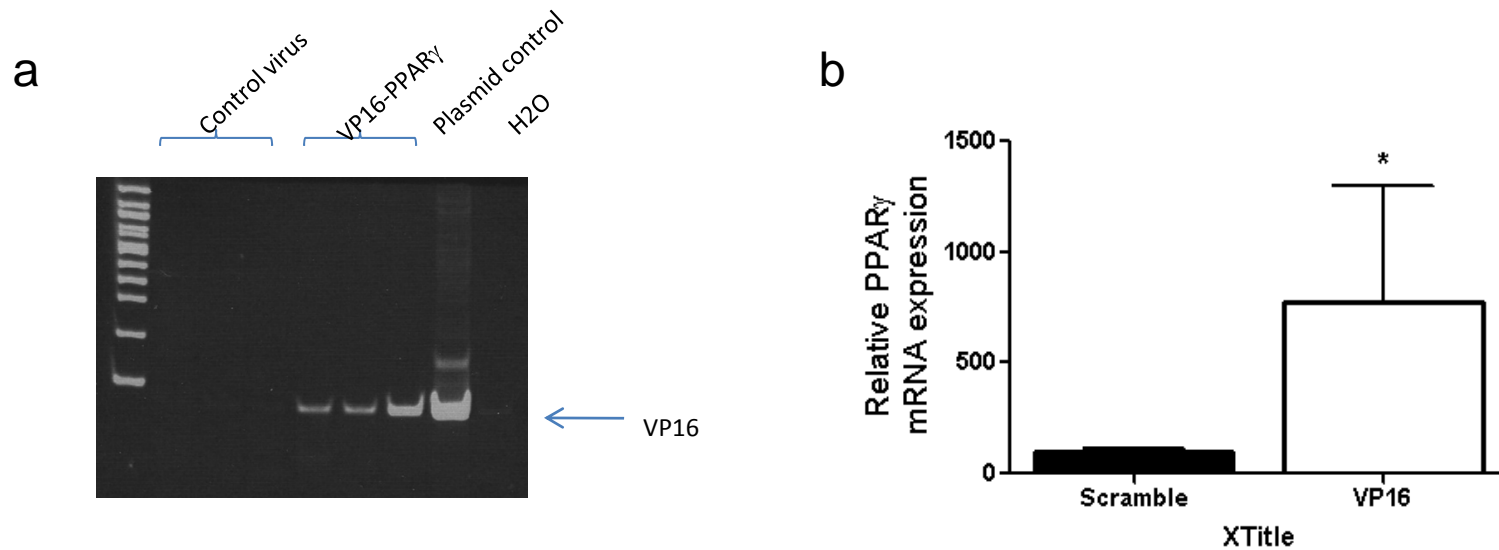

**Supplementary Figure 2. Validation of VP16-PPAR $\gamma$ .** **a**) VP16 mRNA (PCR product shown here) in IVB cells infected with a lentivirus over-expressing VP16-PPAR $\gamma$  or its scrambled control **b**) PPAR $\gamma$  mRNA from the hypothalamus of rats sacrificed 5 d following infection of the medial hypothalamus with a lentivirus over-expressing VP16-PPAR $\gamma$  or its scrambled control (Mann-Whitney test) \* =  $p < 0.05$ . The mean for each group is depicted  $\pm$  S.E.,  $n = 5-6$  rats per group.
