# Supplementary material
Source: PubMed Central journal article supplement (PMC3089657)
Supplement: NIHMS279001-supplement-5.pdf [file NIHMS279001-supplement-5.pdf]

### Supplementary Figure 3

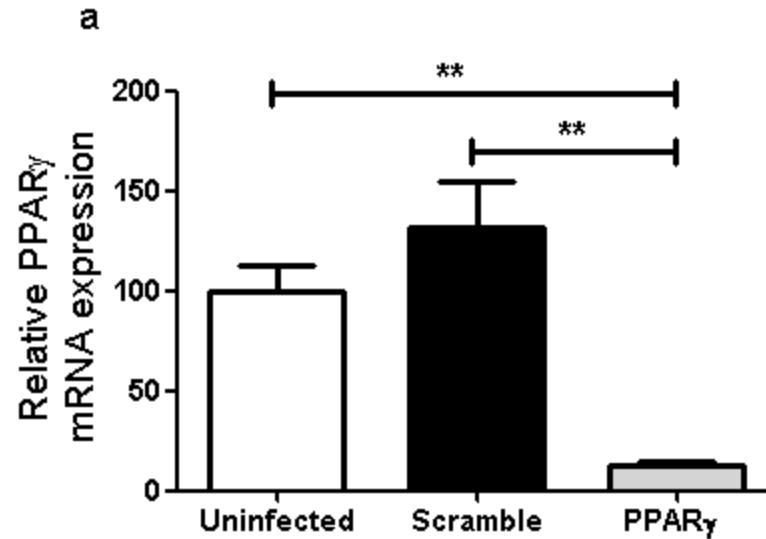

**Supplementary Figure 3. Validation of shRNA.** PPAR $\gamma$  mRNA expression in uninfected IVB cells, cells infected with a lentivirus expressing an shRNA against PPAR $\gamma$ , and cells infected with its scrambled control (ANOVA with Tukey posthoc). \*\* =  $p < 0.01$ . The mean for each group is depicted  $\pm$  S.E.,  $n = 3$  replicates per group.
